# Supplementary material
Source: publisher figshare collection journal article supplement (https://adisjournals.figshare.com/articles/dataset/_/22059635)
Supplement: Supplementary file 1 [file 3]

# Similarities and Differences in the Perception of Atopic Dermatitis Burden Between Patients, Caregivers, and Independent Physicians (AD-GAP survey)

Amy S. Paller · Stephan Weidinger · Korey Capozza · Andrew E. Pink · Mark Tang · Xavier Guillaume · Amy Praestgaard · Marjorie Leclerc · Chien-Chia Chuang · Ryan B. Thomas · Randy Prescilla

## The **A**topic **D**ermatitis **G**lobal **A**dolescent and **P**ediatric (AD-GAP) online survey

was developed to determine how the burden of AD in **pediatric patients** is perceived by **caregivers** and **physicians**, and how these are aligned with the **patients' perceptions**

## BURDEN

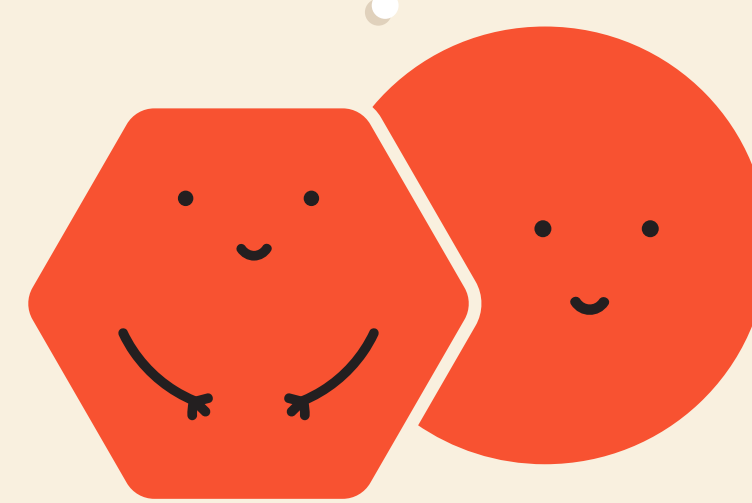

caregivers

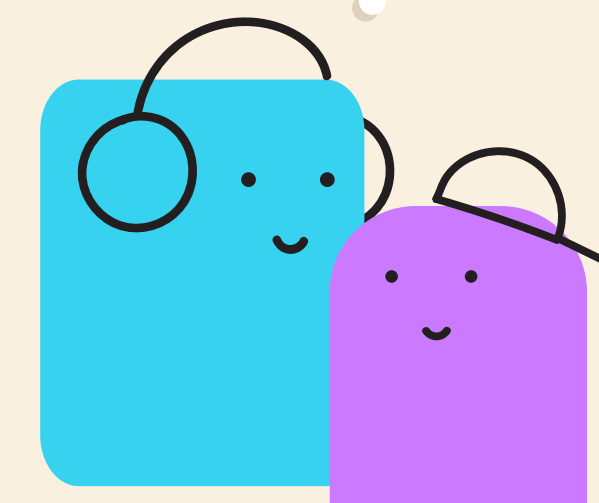

pediatric patients

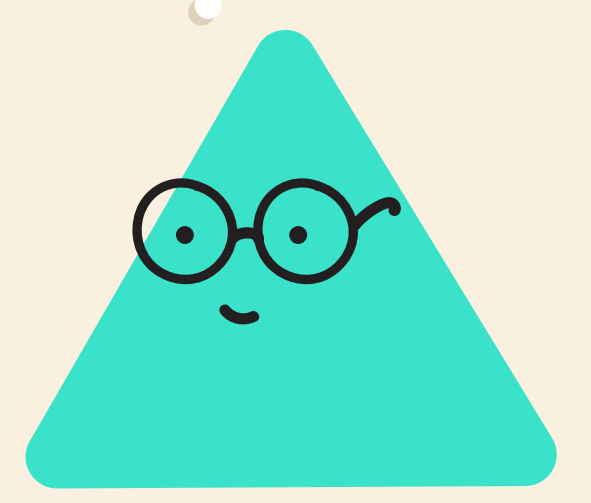

physicians

TREATMENT IS UNPLEASANT  
**FEELING ASHAMED BECAUSE OF AD**  
IMPACT ON CLOTHING CHOICE  
MISSING SCHOOL BECAUSE OF AD  
NOT BEING ABLE TO MEET/PLAY WITH FRIENDS BECAUSE OF AD  
HAVING TO FOLLOW A SPECIFIC DIET  
**YOUR ECZEMA DISTURBS YOUR SLEEP**  
TROUBLE CONCENTRATING IN SCHOOL  
TENSIONS IN THE FAMILY BECAUSE OF AD  
AVOIDING ACTIVITIES YOU WOULD LIKE TO DO  
DAILY SKIN CARE TAKES TIME  
**FEELING SAD OR ANXIOUS**  
**GETS SINGLED OUT BECAUSE OF AD**  
VOLUNTARILY ISOLATES FROM OTHERS  
FEELING IRRITATED BECAUSE OF AD  
RELIEF FROM TREATMENT IS LIMITED OVER TIME

This survey was conducted in **13 COUNTRIES** and consisted of **16 items** that evaluated key aspects of patient's quality of Life

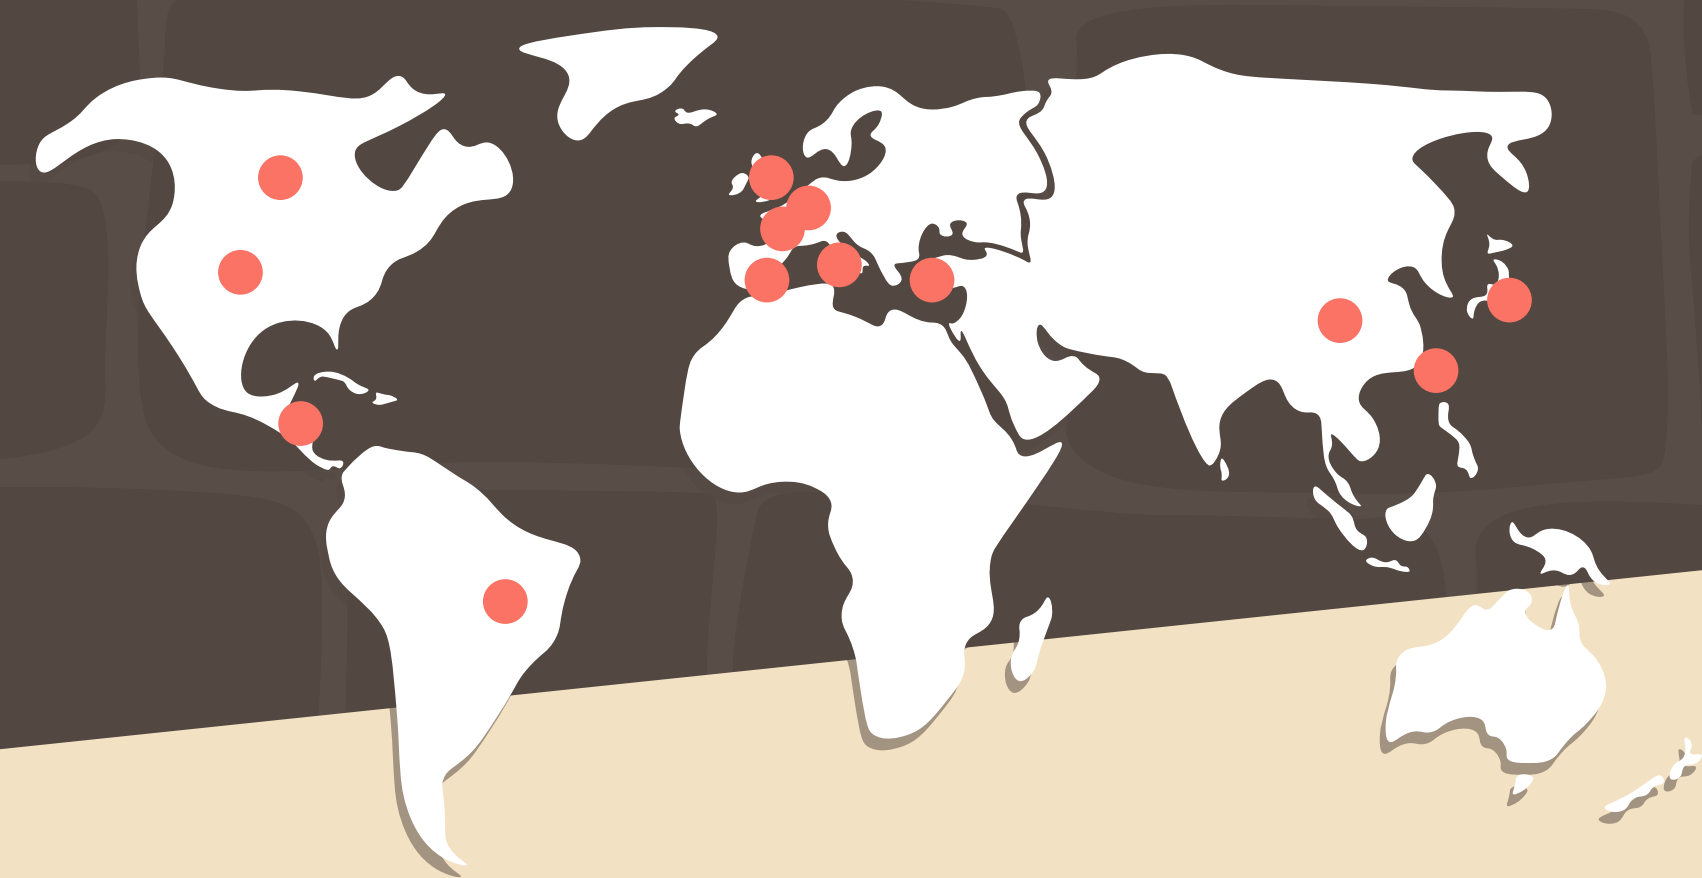

The results showed that **pediatric patients** (children and adolescents) and their caregivers ranked **disturbed sleep** and **feeling ashamed** because of AD as the most important aspects of AD burden

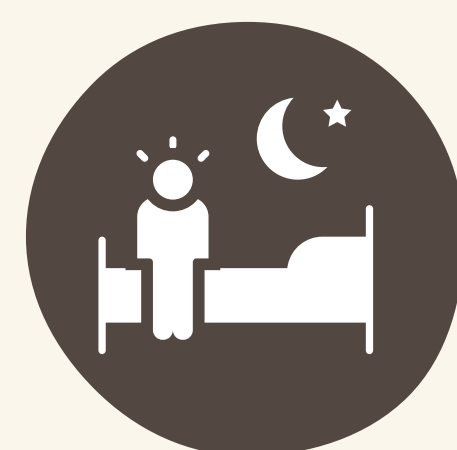

**DISTURBED SLEEP**

&

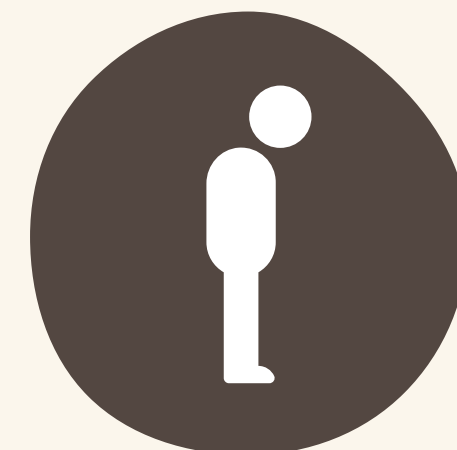

**FEELING ASHAMED**

**701** children aged 6–11 years

**746** adolescents aged 12–17 years

**1447** patients' caregivers

**Physicians** ranked **feeling ashamed because of AD** as the most important factor for both pediatric patients age groups

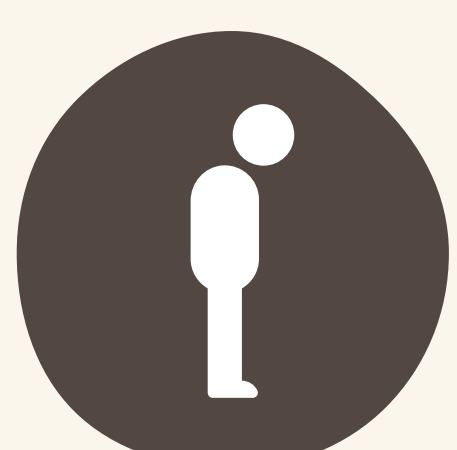

**FEELING ASHAMED**

**1092** independent physicians

- QoL items were ranked similarly between groups
- Patients' perceptions of the overall impact of AD on their QoL was somewhat better aligned with those of their caregivers than with physicians
- Understanding the emotional impact of AD is important for a holistic approach to disease management
